# Supplementary material for: Die Rolle von arbeitsplatzbezogener Flexibilisierung und die Betrachtung von individuellen Werten für Mitarbeitendenbindung in der Arbeitswelt 4.0
Source: Atypon-hosted journal article supplement (doi:10.1026/0932-4089/a000364), 2021-09-24
Supplement: 0932-4089_a000364_esm1.pdf [file 0932-4089_a000364_esm1.pdf]

**Tabelle E1.** Messmodelle zu den latenten Variablen und zum Strukturmodell mit entsprechenden Alternativmodellen (Studie 1)

| <b>Latente Konstrukte [Modell]</b>                                                                                                        | <i>Items</i> | $\chi^2$    | <i>df</i> | <i>p</i>   | $\chi^2 / df$ | <i>RMSEA</i> | <i>CFI</i>  |
|-------------------------------------------------------------------------------------------------------------------------------------------|--------------|-------------|-----------|------------|---------------|--------------|-------------|
| zeitliche Flexibilisierung, räumliche Flexibilisierung [2 Faktoren] <sup>b</sup>                                                          | 5            | 16.94       | 4         | .02        | 4.23          | .085         | .986        |
| zeitliche & räumliche Flexibilisierung [1 Faktor] <sup>a</sup>                                                                            | 5            | 179.79      | 5         | .00        | 35.96         | .280         | .807        |
| Work-Life-Balance [1 Faktor]                                                                                                              | 5            | 14.26       | 5         | .01        | 2.81          | .064         | .993        |
| Beziehung zu Vorgesetzten [1 Faktor]                                                                                                      | 4            | 17.66       | 2         | .00        | 8.83          | .132         | .985        |
| <b>Autonomie [1 Faktor]<sup>b</sup></b>                                                                                                   | <b>3</b>     | <b>3.77</b> | <b>1</b>  | <b>.05</b> | <b>3.77</b>   | <b>.079</b>  | <b>.993</b> |
| zeitliche Flexibilisierung, räumliche Flexibilisierung, Autonomie, Work-Life-Balance, Beziehung zu Vorgesetzten [5 Faktoren] <sup>b</sup> | 17           | 633.62      | 120       | .00        | 5.28          | .098         | .875        |
| zeitliche & räumliche Flexibilisierung, Autonomie, Work-Life-Balance, Beziehung zu Vorgesetzten [4 Faktoren]                              | 17           | 702.62      | 119       | .00        | 5.90          | .105         | .857        |
| zeitliche & räumliche Flexibilisierung, & Autonomie, Work-Life-Balance, Beziehung zu Vorgesetzten [3 Faktoren]                            | 17           | 1007.61     | 119       | .00        | 8.47          | .129         | .783        |
| zeitliche & räumliche Flexibilisierung, & Autonomie & Work-Life-Balance, Beziehung zu Vorgesetzten [2 Faktoren]                           | 17           | 1715.56     | 119       | .00        | 14.42         | .173         | .610        |
| zeitliche & räumliche Flexibilisierung, & Autonomie & Work-Life-Balance & Beziehung zu Vorgesetzten [1 Faktor]                            | 17           | 2287.10     | 119       | .00        | 19.22         | .202         | .470        |
| <b>Strukturmodelle</b>                                                                                                                    |              |             |           |            |               |              |             |
| Strukturmodell (vgl. Abb. 1)                                                                                                              | 22           | 591.78      | 179       | .00        | 3.31          | .072         | .926        |

Alternatives Strukturmodell

|                                                      |    |        |     |     |      |      |      |
|------------------------------------------------------|----|--------|-----|-----|------|------|------|
| (ausschließl. direkte<br>Zusammenhänge) <sup>c</sup> | 22 | 714.53 | 185 | .00 | 3.86 | .080 | .905 |
|------------------------------------------------------|----|--------|-----|-----|------|------|------|

---

*Anmerkungen:* <sup>a</sup> Alternative Messmodelle mit einem Generalfaktor; <sup>b</sup> in diesem Model wurde für zwei Items der Skala das Regressionsgewicht auf 1 gesetzt, um eine Identifizierung des Modells zu ermöglichen; <sup>c</sup> Alternatives Strukturmodell, das ausschließlich direkte Zusammenhängen aller latenten Variablen mit der abhängigen Variable umfasst; für latente Variablen mit zwei Items wurden keine einzelnen Messmodelle berechnet.
