# Supplementary material for: Die Rolle von arbeitsplatzbezogener Flexibilisierung und die Betrachtung von individuellen Werten für Mitarbeitendenbindung in der Arbeitswelt 4.0
Source: Atypon-hosted journal article supplement (doi:10.1026/0932-4089/a000364), 2021-09-24
Supplement: 0932-4089_a000364_esm2.pdf [file 0932-4089_a000364_esm2.pdf]

**Tabelle E2.** Messmodelle zu den latenten Variablen und zum Strukturmodell mit entsprechenden Alternativmodellen (Studie 2)

| Latente Konstrukte [Modell]                                                                                                                                | Items | $\chi^2$ | df  | p   | $\chi^2 / df$ | RMSEA | CFI  |
|------------------------------------------------------------------------------------------------------------------------------------------------------------|-------|----------|-----|-----|---------------|-------|------|
| zeitliche Flexibilisierung, räumliche Flexibilisierung [2 Faktoren] <sup>b</sup>                                                                           | 5     | 6.30     | 4   | .18 | 1,58          | .054  | .994 |
| zeitliche & räumliche Flexibilisierung [1 Faktor] <sup>a</sup>                                                                                             | 5     | 68.20    | 5   | .00 | 13,64         | .251  | .849 |
| Work-Life-Balance [1 Faktor]                                                                                                                               | 5     | 9.62     | 5   | .09 | 1.93          | .068  | .992 |
| Beziehung zu Vorgesetzten [1 Faktor]                                                                                                                       | 4     | 7.79     | 2   | .02 | 3.89          | .120  | .981 |
| Autonomie [1 Faktor] <sup>b</sup>                                                                                                                          | 3     | 1.79     | 1   | .18 | 1,79          | .063  | .993 |
| Bewahrungswerte [1 Faktor] <sup>b</sup>                                                                                                                    | 3     | 1.62     | 1   | .20 | 1,62          | .055  | .979 |
| zeitliche Flexibilisierung, räumliche Flexibilisierung, Autonomie, Work-Life-Balance, Beziehung zu Vorgesetzten, Bewahrungswerte [6 Faktoren] <sup>b</sup> | 20    | 438.19   | 171 | .00 | 2.56          | .088  | .839 |
| zeitliche Flexibilisierung & räumliche Flexibilisierung, Autonomie, Work-Life-Balance, Beziehung zu Vorgesetzten, Bewahrungswerte [5 Faktoren]             | 20    | 455.77   | 170 | .00 | 2.68          | .091  | .828 |
| zeitliche & räumliche Flexibilisierung & Autonomie, Work-Life-Balance, Beziehung zu Vorgesetzten, Bewahrungswerte [4 Faktoren]                             | 20    | 535.38   | 170 | .00 | 3.15          | .103  | .780 |
| zeitliche & räumliche Flexibilisierung, & Autonomie & Work-Life-Balance, Beziehung zu Vorgesetzten, Bewahrungswerte [3 Faktoren]                           | 20    | 860.21   | 170 | .00 | 5.06          | .142  | .585 |
| zeitliche & räumliche Flexibilisierung, & Autonomie & Work-Life-Balance & Beziehung zu                                                                     | 20    | 1051.35  | 170 | .00 | 6.18          | .161  | .470 |

Vorgesetzten, Bewahrungswerte [2  
Faktoren]

zeitliche & räumliche

Flexibilisierung, & Autonomie &

Work-Life-Balance & Beziehung zu

Vorgesetzten & Bewahrungswerte

[1 Faktor]

|    |         |     |     |      |      |      |
|----|---------|-----|-----|------|------|------|
| 20 | 1076.39 | 170 | .00 | 6.33 | .163 | .455 |
|----|---------|-----|-----|------|------|------|

### Strukturmodelle

|                              |    |        |     |     |       |      |      |
|------------------------------|----|--------|-----|-----|-------|------|------|
| Strukturmodell (vgl. Abb. 2) | 25 | 464.96 | 241 | .00 | 1.929 | .068 | .900 |
|------------------------------|----|--------|-----|-----|-------|------|------|

Alternatives Strukturmodell

(ausschließl. direkte

Zusammenhänge)<sup>c</sup>

|    |        |     |     |      |      |      |
|----|--------|-----|-----|------|------|------|
| 25 | 523.38 | 247 | .00 | 2.12 | .075 | .887 |
|----|--------|-----|-----|------|------|------|

---

Anmerkungen: <sup>a</sup> Alternative Messmodelle mit einem Generalfaktor; <sup>b</sup> in diesem Model wurde für zwei Items der Skala das Regressionsgewicht auf 1 gesetzt, um eine Identifizierung des Modells zu ermöglichen; <sup>c</sup> Alternatives Strukturmodell, das ausschließlich direkte Zusammenhängen aller latenten Variablen mit der abhängigen Variable umfasst; für latente Variablen mit zwei Items wurden keine einzelnen Messmodelle berechnet.
