# Supplementary material for: Die Rolle von arbeitsplatzbezogener Flexibilisierung und die Betrachtung von individuellen Werten für Mitarbeitendenbindung in der Arbeitswelt 4.0
Source: Atypon-hosted journal article supplement (doi:10.1026/0932-4089/a000364), 2021-09-24
Supplement: 0932-4089_a000364_esm3.pdf [file 0932-4089_a000364_esm3.pdf]

## Items

### Zeitliche Flexibilisierung

- Ich kann mir meine Arbeitszeit flexibel einteilen. (ZF 1)
- Von meinem Arbeitgeber wird kein fester Beginn meines Arbeitstages festgelegt (z.B. durch Gleitzeit). (ZF 2)

### Räumliche Flexibilisierung

- Ich arbeite regelmäßig im Homeoffice. (RF 1)
- Ich beantworte berufliche Mails auch außerhalb des Büros (z.B. Zuhause, im Zug). (RF 2)
- Ich arbeite während meiner regulären Arbeitszeit regelmäßig außerhalb des Büros (z.B. Zuhause, im Zug). (RF 3)

### Autonomie

- Innerhalb meines Tätigkeitsbereichs wird mir Verantwortung übertragen. (A 1)
- Im Rahmen meiner Tätigkeit kann ich selbstständig und autonom arbeiten. (A 2)
- Meine Tätigkeit beinhaltet interessante und abwechslungsreiche Aufgabeninhalte. (A 3)

### Work-Life-Balance

- Ich bin zufrieden mit meiner Balance zwischen Arbeit und Privatleben. (WLB 1)
- Ich kann die Anforderungen aus meinem Privatleben und die Anforderungen aus meinem Berufsleben gleichermaßen gut erfüllen. (WLB 2)
- Es gelingt mir, einen guten Ausgleich zwischen belastenden und erholsamen Tätigkeiten in meinem Leben zu erreichen. (WLB 3)
- Ich bin damit zufrieden, wie meine Prioritäten in Bezug auf den Beruf und das Privatleben verteilt sind. (WLB 4)
- Es fällt mir schwer, Berufs- und Privatleben miteinander zu vereinbaren. (WLB 5)

### Beziehung zu Vorgesetzten

- Mein Vorgesetzter macht Entscheidungen transparent. (BV 1)
- Ich habe ein vertrauensvolles Verhältnis zu meinem Vorgesetzten. (BV 2)
- Ich bekomme regelmäßige Feedbacks über meine Arbeit. (BV 3)
- Mein Vorgesetzter ist offen für meine Belange (BV 4)

### Bleibeabsicht

- Ich fühle mich sehr gut mit der Vorstellung, meine nahe Zukunft in diesem Unternehmen zu verbringen. (B 1)
- Ich wäre froh, mein weiteres Arbeitsleben in diesem Unternehmen zu verbringen. (B 2)

### Bewahrungswerte

- Es ist ihm/ihr wichtig, zurückhaltend und bescheiden zu sein. Er/Sie versucht, die Aufmerksamkeit nicht auf sich zu lenken. (BW 1)
- Es ist ihm/ihr wichtig, in einem sicheren Umfeld zu leben. Er/Sie vermeidet alles, was seine/ihre Sicherheit gefährden könnte. (BW 2)
- Er/Sie glaubt, dass die Menschen tun sollten, was man ihnen sagt. Er/Sie denkt, dass Menschen sich immer an Regeln halten sollten, selbst dann, wenn es niemand sieht. (BW 3)
